# Supplementary material for: Laryngeal Cancer Cells Metabolize 25-Hydroxyvitamin D3 and Respond to 24R,25-dihydroxyvitamin D3 via a Mechanism Dependent on Estrogen Receptor Levels
Source: MDPI journal article supplement (doi:10.3390/cancers16091635), 2024-04-24
Supplement: s1 [file s1]

## Supplementary Methods

**Supplemental Table S1:** Gene specific primers.

| GENE                                    | FORWARD                                | REVERSE                |
|-----------------------------------------|----------------------------------------|------------------------|
| <b>GAPDH</b>                            | GCTCTCCAGAACATCATCC                    | TGCTTCACCACCTTCTTG     |
| <b>Human ER<math>\alpha</math>66</b>    | TGCCTGGAGTGATGTTTAAGC                  | ACGGGAGCAAGTGCAGTC     |
| <b>Human ER<math>\alpha</math>66/46</b> | TGCGTCGCCTCTAACCTCG                    | TCCCAGATGCTTTGGTGTGG   |
| <b>Human ER<math>\alpha</math>36</b>    | TCCTCGTGTCTAAAGCCTCTG                  | AAAATGTCCCCACGTCCACA   |
| <b>Human ESR2</b>                       | CCTCCTATGTAGACAGCCACCA                 | TGGCGCAACGGTTCCCACTAA  |
| <b>Human GPR30</b>                      | TTCAGCAGTGCCGTGTAGA                    | GTGTGCAGCTCCCGAGTC     |
| <b>Human VDR</b>                        | CTGCTTGTCAAAAGGCGGC                    | ACCCAAAGGCTTCTGGTCC    |
| <b>Human BAX</b>                        | GACGAACTGGACAGTAACATGG                 | AAAGTAGAAAAGGGCGACAACC |
| <b>Human BCL2</b>                       | Hs_BCL2-1-SG QuantiTect Primer #249900 |                        |
| <b>Human CYP24A1</b>                    | GACATCCAGGCCACAGACAA                   | ACCACCATCTGAGGCGTATT   |
| <b>Human CYP27B1</b>                    | AGAGTTGCTATTGGCGGGAG                   | AGAACAGTGGCTGAGGGGTA   |
| <b>Rat CYP24A1</b>                      | TCATCTCCCATTCGGCATCG                   | TCTGGTCCTTGAAGTTCGCC   |
| <b>Rat CYP27B1</b>                      | CCATCGAGTCCAACCTGCCTT                  | AGGGTCGGCCACATAAACTG   |

## Supplemental Figure S1

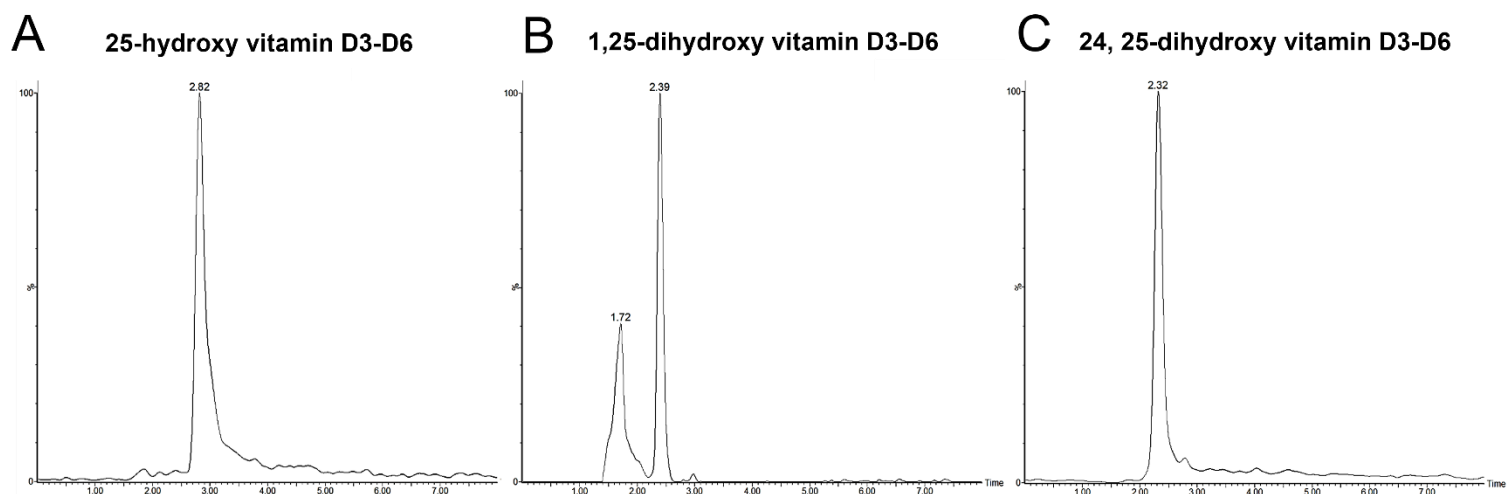

**Supplemental Figure S1:** Calibration curves. The calibration curve of 25-hydroxyvitamin d3-d6 (**A**), 1,25-dihydroxyvitamin d3-d6 (**B**), and 24,25-dihydroxyvitamin d3-d6 (**C**) used to create standards.

## Supplemental Figure S2

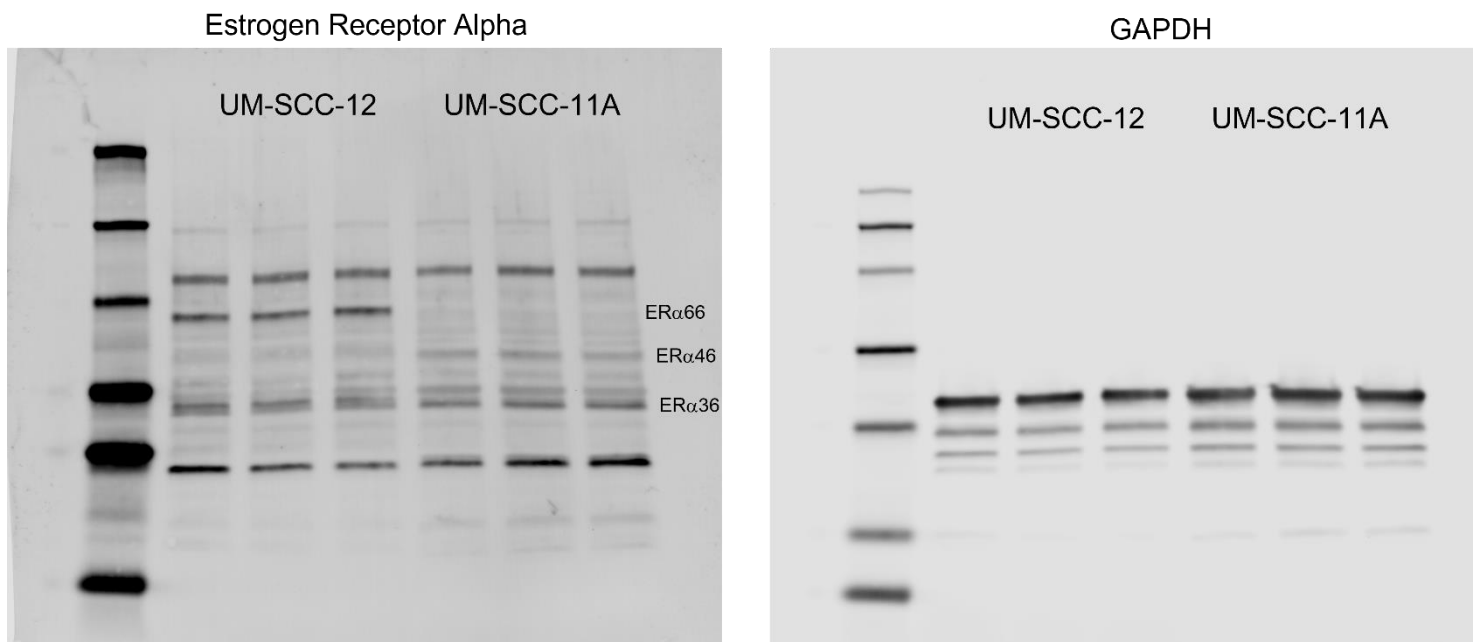

**Supplemental Figure S2:** Original western blots of estrogen receptor alpha protein levels in UM-SCC-12 and UM-SCC-11A cells.

### Supplemental Figure S3

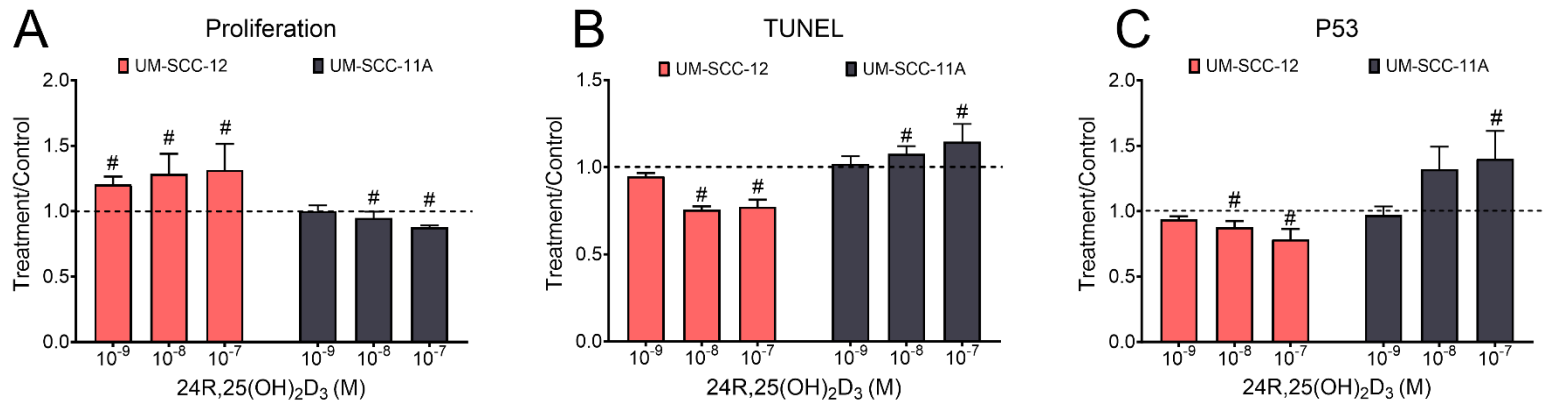

**Supplemental Figure S3:** Analysis of 24R,25(OH)<sub>2</sub>D<sub>3</sub> effect on tumorigenesis. Treatment over control analysis of UM-SCC-12 and UM-SCC-11A cell proliferation after treatment with 24R,25(OH)<sub>2</sub>D<sub>3</sub> (**A**). Treatment over control analysis of UM-SCC-12 and UM-SCC-11A cells treated with 24R,25(OH)<sub>2</sub>D<sub>3</sub> and assessed for TUNEL (**B**). P53 analysis of UM-SCC-12 and UM-SCC-11A cells after treatment with 24R,25(OH)<sub>2</sub>D<sub>3</sub> (**C**). Data are presented as the mean  $\pm$  standard error of 3 independent experiments. Groups labeled with a “#” are statistically different compared to the vehicle control by Wilcoxon matched-pairs signed rank test with p-values  $\leq 0.05$  determined as significant.
